# Supplementary material for: Exploring winter diet, gut microbiota and parasitism in caribou using multi-marker metabarcoding of fecal DNA
Source: Research Square preprint supplement (doi:10.21203/rs.3.rs-4455656/v2), 2024-10-17
Supplement: Supplementary file 1 [file a5145342161b34bce93b6097.docx]

**Supplementary Table S1. Samples analyzed in this study**

| Sampling locations | Short name | Province | Collection year | Number of males | Number of females | Ecozone |
| --- | --- | --- | --- | --- | --- | --- |
| Central Saskatchewan | CSK | SK | 2017 | 8 | 8 | Boreal plain |
| Charron Lake | Char | MB | 2015 | 8 | 8 | Boreal shield |
| Flin Flon | Flin | SK | 2014 | 4 | 4 | Boreal plain |
| La Ronge | Ron | SK | 2013 | 4 | 4 | Boreal shield |
| Naosap-Reed | Nao | MB | 2015 | 8 | 8 | Boreal plain |
| The Bog | Bog | MB | 2017 | 8 | 8 | Boreal plain |
| Wabowden | Wab | MB | 2015 | 8 | 8 | Boreal plain |

**Supplementary Table S2. List of primers used in this study.**

| **Target group** | **Taxonomic marker** | **Primer name** | **Sequence** | **Reference** |
| --- | --- | --- | --- | --- |
| Prokaryotes | 16S rRNA gene, V4-V5 region | 515F-Y | GTGYCAGCMGCCGCGGTAA | Parada et al., 2015 |
| 926R | CCGYCAATTYMTTTRAGTTT |
| Eukaryotes | 18S rRNA gene, V4 region | 565F | CCAGCASCYGCGGTAATTCC | Stoeck et al., 2010 |
| 948R | ACTTTCGTTCTTGATYRA |
| Plants | ITS2 | ITS2F | ATGCGATACTTGGTGTGAAT | Chen et al., 2010 |
| ITS3R | GACGCTTCTCCAGACTACAAT |
| Fungi | ITS2 | ITS9F | GAACGCAGCRAAIIGYGA | Menkis et al., 2012; White et al., 1990 |
| ITS4R | TCCTCCGCTTATTGATATGC |

**Supplementary Table S3A. Effect of location and sex on the relative abundance of the 20 most abundant eukaryotic phyla (18S rRNA gene dataset)**

|  |  | Relative abundance | | | | | | |  | Relative abundance | |
| --- | --- | --- | --- | --- | --- | --- | --- | --- | --- | --- | --- |
| Phylum | Location Kruskal Pvalue | Bog | Char | CSK | Flin | Nao | Ron | Wab | Sex Kruskal Pvalue | F | M |
| **Phragmoplastophyta#** | **0.045** | **0.201a*** | **0.189a** | **0.290a** | **0.236a** | **0.224a** | **0.246a** | **0.185a** | 0.272 | 0.231 | 0.213 |
| **Archamoebae** | **0.049** | **0.172ab** | **0.155ab** | **0.102a** | **0.147ab** | **0.278b** | **0.122ab** | **0.249ab** | **0.045** | **0.212** | **0.149** |
| Nematoda | 0.733 | 0.163 | 0.107 | 0.101 | 0.070 | 0.073 | 0.109 | 0.153 | **0.000** | **0.050** | **0.178** |
| **Chlorophyta** | **0.000** | **0.194a** | **0.100ab** | **0.080b** | **0.143ab** | **0.107ab** | **0.157ab** | **0.063b** | 0.123 | 0.121 | 0.111 |
| **Vertebrata** | **0.000** | **0.068ab** | **0.181c** | **0.136ac** | **0.126abc** | **0.075ab** | **0.046b** | **0.098abc** | 0.475 | 0.111 | 0.105 |
| **Arthropoda** | **0.006** | **0.038a** | **0.080a** | **0.088a** | **0.096a** | **0.053a** | **0.059a** | **0.031a** | 0.433 | 0.063 | 0.061 |
| **Basidiomycota** | **0.000** | **0.030abc** | **0.036ab** | **0.055c** | **0.025abc** | **0.018a** | **0.046bc** | **0.052abc** | 0.468 | 0.041 | 0.034 |
| **Neocallimastigomycota** | **0.000** | **0.039abc** | **0.067a** | **0.011b** | **0.036abc** | **0.048abc** | **0.084ac** | **0.013bc** | 0.398 | 0.037 | 0.044 |
| **Apicomplexa** | **0.031** | **0.028a** | **0.021a** | **0.067a** | **0.039a** | **0.021a** | **0.029a** | **0.034a** | 0.115 | 0.039 | 0.029 |
| **Unassigned** | **0.011** | **0.017a** | **0.029ab** | **0.025ab** | **0.024ab** | **0.013a** | **0.049b** | **0.023ab** | 0.153 | 0.026 | 0.022 |
| **SAR** | **0.000** | **0.013ab** | **0.006a** | **0.006a** | **0.020ab** | **0.063b** | **0.000a** | **0.065ab** | 0.481 | 0.030 | 0.023 |
| **Ochrophyta** | **0.000** | **0.007a** | **0.001b** | **0.002b** | **0.004ab** | **0.002ab** | **0.009a** | **0.004ab** | 0.172 | 0.004 | 0.003 |
| **Ascomycota** | **0.006** | **0.013ab** | **0.012ab** | **0.021a** | **0.007ab** | **0.005b** | **0.010ab** | **0.011ab** | 0.426 | 0.013 | 0.011 |
| **Ciliophora** | **0.011** | **0.007a** | **0.004a** | **0.005a** | **0.008a** | **0.005a** | **0.011a** | **0.004a** | **0.000** | **0.007** | **0.004** |
| **Chytridiomycota** | **0.002** | **0.003ab** | **0.005ab** | **0.006ab** | **0.012a** | **0.006ab** | **0.013a** | **0.004b** | 0.156 | 0.007 | 0.005 |
| Mucoromycota | 0.057 | 0.001 | 0.002 | 0.001 | 0.001 | 0.001 | 0.002 | 0.001 | 0.126 | 0.001 | 0.001 |
| Tardigrada | 0.303 | 0.001 | 0.002 | 0.001 | 0.000 | 0.003 | 0.001 | 0.004 | 0.240 | 0.002 | 0.002 |
| Cryptomycota | 0.224 | 0.001 | 0.000 | 0.000 | 0.001 | 0.000 | 0.001 | 0.000 | 0.781 | 0.001 | 0.000 |
| **Rotifera** | 0.158 | 0.001 | 0.001 | 0.002 | 0.001 | 0.001 | 0.002 | 0.000 | **0.033** | **0.002** | **0.001** |
| **Dinoflagellata** | **0.014** | **0.001a** | **0.000a** | **0.000a** | **0.001a** | **0.000a** | **0.001a** | **0.003a** | 0.614 | 0.000 | 0.001 |

**#**Bold characters identify phyla for which the Kruskal-Wallis test for location and/or sex is significant at p<0.05.*Different letters within each line indicate significant differences among locations based on Dunn post hoc test. Bog = The Bog (MB), Char = Charron Lake (MB), CSK = Central Saskatchewan (SK), Flin = Flin Flon (SK), Nao = Naosap-Reed (MB), Ron = La Ronge (SK) and Wab = Wabowden (MB).

**Supplementary Table S3B. Effect of sampling location and sex on eukaryotic alpha diversity (18S rRNA gene dataset)**

|  | **Chao#** |  | **Shannon** |  |
| --- | --- | --- | --- | --- |
| Location Kruskal Pvalue | **0.000** |  | **0.015** |  |
| Bog | **88.063** | a* | **2.836** | a |
| Char | **80.118** | a | **2.907** | ab |
| CSK | **97.063** | ab | **3.129** | ab |
| Flin | **105.500** | ab | **3.233** | ab |
| Nao | **82.625** | a | **3.130** | ab |
| Ron | **131.125** | b | **3.512** | b |
| Wab | **72.800** | a | **2.846** | a |
| Sex Kruskal Pvalue | **0.045** |  | **0.027** |  |
| F | **95.271** |  | **3.163** |  |
| M | **84.542** |  | **2.912** |  |

**#**Bold characters identify alpha diversity indices for which the Kruskal-Wallis test for location and/or sex is significant at p<0.05.*Different letters within a column indicate significant differences among locations based on Dunn post hoc test. Bog = The Bog (MB), Char = Charron Lake (MB), CSK = Central Saskatchewan (SK), Flin = Flin Flon (SK), Nao = Naosap-Reed (MB), Ron = La Ronge (SK) and Wab = Wabowden (MB).

**Supplementary Table S3C. Adonis pairwise comparison of eukaryotic beta diversity between locations (18S rRNA gene dataset)**

| ADONIS pairwise comparison | Df | SumsOfSqs | F.Model | R2 | p.value | p.adjusted |
| --- | --- | --- | --- | --- | --- | --- |
| **The Bog (MB) vs Naosap-Reed (MB)#** | **1** | **0.747** | **3.958** | **0.117** | **0.001** | **0.021** |
| **The Bog (MB) vs Wabowden (MB)** | **1** | **0.727** | **3.319** | **0.103** | **0.002** | **0.042** |
| **The Bog (MB) vs Charron Lake (MB)** | **1** | **0.868** | **4.366** | **0.123** | **0.001** | **0.021** |
| **The Bog (MB) vs Central Saskatchewan (SK)** | **1** | **1.090** | **4.992** | **0.143** | **0.001** | **0.021** |
| The Bog (MB) vs Flin Flon (SK) | 1 | 0.438 | 2.041 | 0.085 | 0.018 | 0.378 |
| **The Bog (MB) vs La Ronge Lake (SK)** | **1** | **0.698** | **3.295** | **0.130** | **0.002** | **0.042** |
| Naosap-Reed (MB) vs Wabowden (MB) | 1 | 0.598 | 3.183 | 0.099 | 0.004 | 0.084 |
| **Naosap-Reed (MB) vs Charron Lake (MB)** | **1** | **0.742** | **4.376** | **0.124** | **0.001** | **0.021** |
| **Naosap-Reed (MB) vs Central Saskatchewan (SK)** | **1** | **1.432** | **7.613** | **0.202** | **0.001** | **0.021** |
| Naosap-Reed (MB) vs Flin Flon (SK) | 1 | 0.390 | 2.249 | 0.093 | 0.003 | 0.063 |
| **Naosap-Reed (MB) vs La Ronge Lake (SK)** | **1** | **0.658** | **3.857** | **0.149** | **0.001** | **0.021** |
| **Wabowden (MB) vs Charron Lake (MB)** | **1** | **0.668** | **3.369** | **0.101** | **0.001** | **0.021** |
| **Wabowden (MB) vs Central Saskatchewan (SK)** | **1** | **0.961** | **4.401** | **0.132** | **0.001** | **0.021** |
| Wabowden (MB) vs Flin Flon (SK) | 1 | 0.411 | 1.914 | 0.084 | 0.039 | 0.819 |
| **Wabowden (MB) vs La Ronge Lake (SK)** | **1** | **0.875** | **4.134** | **0.164** | **0.001** | **0.021** |
| **Charron Lake (MB) vs Central Saskatchewan (SK)** | **1** | **1.031** | **5.198** | **0.144** | **0.001** | **0.021** |
| Charron Lake (MB) vs Flin Flon (SK) | 1 | 0.316 | 1.680 | 0.068 | 0.032 | 0.672 |
| **Charron Lake (MB) vs La Ronge Lake (SK)** | **1** | **0.553** | **2.986** | **0.115** | **0.001** | **0.021** |
| **Central Saskatchewan (SK) vs Flin Flon (SK)** | **1** | **0.695** | **3.249** | **0.129** | **0.001** | **0.021** |
| **Central Saskatchewan (SK) vs La Ronge Lake (SK)** | **1** | **1.122** | **5.316** | **0.195** | **0.001** | **0.021** |
| Flin Flon (SK) vs La Ronge Lake (SK) | 1 | 0.398 | 1.979 | 0.124 | 0.005 | 0.105 |

**#**Bold characters identify significant Adonis pairwise comparisons (adjusted p<0.05).Bog = The Bog (MB), Char = Charron Lake (MB), CSK = Central Saskatchewan (SK), Flin = Flin Flon (SK), Nao = Naosap-Reed (MB), Ron = La Ronge (SK) and Wab = Wabowden (MB).

**Supplementary Table S3D. Effect of location and sex on the number of ASVs from parasites (18S rRNA gene dataset)**

| Parasite | **All parasites**  **ASVs#** |  | **Blastocystis**  **ASVs** |  | Eimeria  ASVs | **Entamoeba**  **ASVs** |  | **Nematodirella ASVs** |  | **Parelaphostrongylus**  **ASVs** |
| --- | --- | --- | --- | --- | --- | --- | --- | --- | --- | --- |
| Location Kruskal Pvalue | **0.000** |  | **0.000** |  | 0.695 | **0.000** |  | **0.001** |  | 0.599 |
| Bog | **6.438** | a* | **0.688** | ab | 0.000 | **4.250** | a | **0.063** | ab | 1.438 |
| Char | **6.588** | a | **0.235** | a | 0.059 | **5.118** | ab | **0.412** | ab | 0.647 |
| CSK | **6.563** | a | **0.625** | ab | 0.063 | **4.750** | ab | **0.250** | ab | 0.813 |
| Flin | **8.125** | ab | **1.250** | b | 0.000 | **6.375** | abc | **0.000** | ab | 0.500 |
| Nao | **9.250** | b | **1.250** | b | 0.000 | **7.375** | c | **0.000** | b | 0.563 |
| Ron | **6.500** | a | **0.000** | a | 0.000 | **5.750** | abc | **0.000** | ab | 0.750 |
| Wab | **7.867** | ab | **0.800** | ab | 0.000 | **6.133** | bc | **0.000** | b | 0.933 |
| Sex Kruskal Pvalue | 0.272 |  | 0.482 |  | 0.155 | 0.208 |  | **0.002** |  | **0.000** |
| F | 7.167 |  | 0.750 |  | 0.042 | 5.958 |  | **0.021** |  | **0.375** |
| M | 7.479 |  | 0.646 |  | 0.000 | 5.250 |  | **0.229** |  | **1.292** |

**#**Bold characters identify groups for which the Kruskal-Wallis test for location and/or sex is significant at p<0.05.*Different letters within a column indicate significant differences among locations based on Dunn post hoc test. Bog = The Bog (MB), Char = Charron Lake (MB), CSK = Central Saskatchewan (SK), Flin = Flin Flon (SK), Nao = Naosap-Reed (MB), Ron = La Ronge (SK) and Wab = Wabowden (MB).

**Supplementary Table S3E. Effect of location and sex on the number of Neocallimastigomycota ASVs (18S rRNA gene and fungal ITS2 dataset)**

|  | **18S** | | ITS fungi |
| --- | --- | --- | --- |
| Location Kruskal Pvalue | **0,013** |  | 0,155 |
| Bog | **1,375** | a* | 3,375 |
| Char | **1,000** | ab | 2,118 |
| CSK | **0,563** | b | 1,937 |
| Flin | **1,125** | ab | 2,375 |
| Nao | **1,438** | a | 3 |
| Ron | **1,250** | ab | 2,714 |
| Wab | **0,867** | ab | 2,5 |
| Sex Kruskal Pvalue | 0,482 |  | 0,125 |
| F | 1,125 |  | 2,792 |
| M | 1,021 |  | 2,354 |

*Different letters indicate significant differences among locations based on Dunn post hoc test. Bog = The Bog (MB), Char = Charron Lake (MB), CSK = Central Saskatchewan (SK), Flin = Flin Flon (SK), Nao = Naosap-Reed (MB), Ron = La Ronge (SK) and Wab = Wabowden (MB).

**Supplementary Table S4A. Effect of location and sex on the relative abundance of the 20 most abundant plant families (plant ITS2 dataset)**

| Plant Family | Location Kruskal Pvalue | Bog | Char | CSK | Flin | Nao | Ron | Wab | Sex Kruskal  Pvalue | F | M |
| --- | --- | --- | --- | --- | --- | --- | --- | --- | --- | --- | --- |
| **Ericaceae#** | **0.000** | **0.691a*** | **0.280b** | **0.679a** | **0.210b** | **0.279b** | **0.171b** | **0.229b** | 0.889 | 0.400 | 0.385 |
| **Cyperaceae** | **0.000** | **0.021a** | **0.171b** | **0.115b** | **0.243b** | **0.347b** | **0.225b** | **0.127ab** | 0.717 | 0.183 | 0.154 |
| **Unassigned** | **0.000** | **0.045ab** | **0.179c** | **0.096abc** | **0.046abc** | **0.017a** | **0.018ab** | **0.135bc** | 0.878 | 0.071 | 0.101 |
| **Sphagnaceae** | **0.000** | **0.030ab** | **0.141c** | **0.012a** | **0.081abcd** | **0.070bcd** | **0.023abd** | **0.123cd** | 0.792 | 0.072 | 0.073 |
| **Hylocomiaceae** | **0.000** | **0.025ab** | **0.063ac** | **0.014b** | **0.041abc** | **0.044ac** | **0.145ac** | **0.075c** | 0.593 | 0.049 | 0.054 |
| **Betulaceae** | **0.007** | **0.026ab** | **0.051ab** | **0.011ab** | **0.005a** | **0.076b** | **0.068ab** | **0.085ab** | 0.206 | 0.040 | 0.055 |
| **Salicaceae** | **0.006** | **0.019a** | **0.034a** | **0.015a** | **0.017a** | **0.044a** | **0.143a** | **0.075a** | 0.668 | 0.054 | 0.033 |
| **Menyanthaceae** | **0.015** | **0.000a** | **0.001a** | **0.020a** | **0.226a** | **0.045a** | **0.000a** | **0.048a** | 0.322 | 0.039 | 0.037 |
| **Rosaceae** | **0.000** | **0.035ab** | **0.008c** | **0.004ac** | **0.104b** | **0.045b** | **0.029abc** | **0.021abc** | 0.612 | 0.033 | 0.027 |
| **Polytrichaceae** | **0.000** | **0.004a** | **0.028ab** | **0.005a** | **0.011a** | **0.005a** | **0.133b** | **0.003a** | 0.650 | 0.018 | 0.019 |
| **Juncaginaceae** | **0.049** | **0.039a** | **0.000a** | **0.000a** | **0.000a** | **0.000a** | **0.000a** | **0.042a** | 0.463 | 0.015 | 0.012 |
| **Sarraceniaceae** | **0.000** | **0.045a** | **0.001b** | **0.002b** | **0.000b** | **0.000b** | **0.000b** | **0.000b** | 0.652 | 0.004 | 0.012 |
| Pinaceae | 0.629 | 0.005 | 0.006 | 0.003 | 0.002 | 0.013 | 0.015 | 0.009 | 0.110 | 0.005 | 0.009 |
| **Ptilidiaceae** | **0.000** | **0.001a** | **0.016b** | **0.002a** | **0.001ab** | **0.001ab** | **0.018ab** | **0.014b** | 0.191 | 0.006 | 0.009 |
| Poaceae | 0.550 | 0.000 | 0.002 | 0.018 | 0.001 | 0.001 | 0.008 | 0.001 | 0.711 | 0.002 | 0.007 |
| Cornaceae | 0.696 | 0.000 | 0.010 | 0.000 | 0.000 | 0.001 | 0.000 | 0.000 | 0.155 | 0.004 | 0 |
| Asteraceae | 0.743 | 0.003 | 0.002 | 0.001 | 0.001 | 0.001 | 0.000 | 0.000 | 0.472 | 0.001 | 0.002 |
| Cupressaceae | 0.153 | 0.003 | 0.000 | 0.000 | 0.001 | 0.001 | 0.000 | 0.001 | 0.519 | 0.000 | 0.002 |
| Urticaceae | 0.310 | 0.000 | 0.000 | 0.000 | 0.000 | 0.005 | 0.000 | 0.000 | 0.543 | 0.000 | 0.002 |
| **Myricaceae** | **0.002** | **0.004a** | **0.000b** | **0.000b** | **0.000ab** | **0.001ab** | **0.000ab** | **0.000b** | 0.089 | 0.000 | 0.002 |

**#**Bold characters identify plant families for which the Kruskal-Wallis test for location and/or sex is significant at p<0.05.*Different letters within each line indicate significant differences among locations based on Dunn post hoc test. Bog = The Bog (MB), Char = Charron Lake (MB), CSK = Central Saskatchewan (SK), Flin = Flin Flon (SK), Nao = Naosap-Reed (MB), Ron = La Ronge (SK) and Wab = Wabowden (MB).

**Supplementary Table S4B. Effect of location and sex on plant alpha diversity (plant ITS2 dataset)**

|  | **Chao#** |  | **Shannon** |  |
| --- | --- | --- | --- | --- |
| Location Kruskal Pvalue | **0.005** |  | **0.028** |  |
| Bog | **41.125** | a | **2.564** | ab |
| Char | **39.000** | a | **2.673** | ab |
| CSK | **50.125** | a | **2.531** | ab |
| Flin | **46.625** | a | **2.774** | ab |
| Nao | **51.188** | a | **3.020** | b |
| Ron | **45.143** | a | **2.726** | ab |
| Wab | **40.188** | a | **2.705** | ab |
| Sex Kruskal Pvalue | **0.391** |  | **0.687** |  |
| F | **45.771** |  | **2.737** |  |
| M | **43.271** |  | **2.676** |  |
|  |  |  |  |  |

**#**Bold characters identify alpha diversity indices for which the Kruskal-Wallis test for location and/or sex is significant at p<0.05.*Different letters within a column indicate significant differences among locations based on Dunn post hoc test. Bog = The Bog (MB), Char = Charron Lake (MB), CSK = Central Saskatchewan (SK), Flin = Flin Flon (SK), Nao = Naosap-Reed (MB), Ron = La Ronge (SK) and Wab = Wabowden (MB).

**Supplementary Table S4C. Adonis pairwise comparison of plant beta diversity between locations (plant ITS2 dataset)**

| ADONIS Pairwise comparison | Df | SumsOfSqs | F.Model | R2 | p.value | p.adjusted |
| --- | --- | --- | --- | --- | --- | --- |
| **The Bog (MB) vs Naosap-Reed (MB)#** | **1** | **1.465** | **5.816** | **0.162** | **0.001** | **0.021** |
| **The Bog (MB) vs Wabowden (MB)** | **1** | **1.628** | **6.543** | **0.179** | **0.001** | **0.021** |
| **The Bog (MB) vs Charron Lake (MB)** | **1** | **1.625** | **6.451** | **0.172** | **0.001** | **0.021** |
| **The Bog (MB) vs Central Saskatchewan (SK)** | **1** | **0.898** | **4.312** | **0.126** | **0.003** | **0.063** |
| **The Bog (MB) vs Flin Flon (SK)** | **1** | **1.224** | **4.815** | **0.180** | **0.001** | **0.021** |
| **The Bog (MB) vs La Ronge Lake (SK)** | **1** | **2.220** | **9.643** | **0.315** | **0.001** | **0.021** |
| **Naosap-Reed (MB) vs Wabowden (MB)** | **1** | **0.764** | **2.510** | **0.077** | **0.001** | **0.021** |
| **Naosap-Reed (MB) vs Charron Lake (MB)** | **1** | **1.149** | **3.761** | **0.108** | **0.001** | **0.021** |
| **Naosap-Reed (MB) vs Central Saskatchewan (SK)** | **1** | **1.667** | **6.322** | **0.174** | **0.001** | **0.021** |
| Naosap-Reed (MB) vs Flin Flon (SK) | 1 | 0.487 | 1.479 | 0.063 | 0.084 | 1 |
| **Naosap-Reed (MB) vs La Ronge Lake (SK)** | **1** | **1.278** | **4.134** | **0.164** | **0.001** | **0.021** |
| **Wabowden (MB) vs Charron Lake (MB)** | **1** | **0.831** | **2.746** | **0.081** | **0.001** | **0.021** |
| **Wabowden (MB) vs Central Saskatchewan (SK)** | **1** | **1.896** | **7.273** | **0.195** | **0.001** | **0.021** |
| **Wabowden (MB) vs Flin Flon (SK)** | **1** | **0.686** | **2.107** | **0.087** | **0.001** | **0.021** |
| **Wabowden (MB) vs La Ronge Lake (SK)** | **1** | **1.317** | **4.320** | **0.171** | **0.001** | **0.021** |
| **Charron Lake (MB) vs Central Saskatchewan (SK)** | **1** | **1.437** | **5.459** | **0.150** | **0.001** | **0.021** |
| **Charron Lake (MB) vs Flin Flon (SK)** | **1** | **0.805** | **2.468** | **0.097** | **0.001** | **0.021** |
| **Charron Lake (MB) vs La Ronge Lake (SK)** | **1** | **1.222** | **3.987** | **0.153** | **0.001** | **0.021** |
| **Central Saskatchewan (SK) vs Flin Flon (SK)** | **1** | **1.203** | **4.452** | **0.168** | **0.001** | **0.021** |
| **Central Saskatchewan (SK) vs La Ronge Lake (SK)** | **1** | **1.887** | **7.641** | **0.267** | **0.001** | **0.021** |
| **Flin Flon (SK) vs La Ronge Lake (SK)** | **1** | **1.038** | **2.980** | **0.186** | **0.001** | **0.021** |

**#**Bold characters identify significant Adonis pairwise comparisons (adjusted p<0.05).Bog = The Bog (MB), Char = Charron Lake (MB), CSK = Central Saskatchewan (SK), Flin = Flin Flon (SK), Nao = Naosap-Reed (MB), Ron = La Ronge (SK) and Wab = Wabowden (MB).

**Supplementary Table S4D. Effect of location and sex on the number of plant ASVs (plant ITS2 dataset)**

|  | Total number of ASVs composing the diet | **Number of herbaceous plant ASVs#** |  | **Number of non-vascular plant ASVs** |  | **Number of lignified plant ASVs** |  |
| --- | --- | --- | --- | --- | --- | --- | --- |
| Location Kruskal Pvalue | 0.102 | **0.000** |  | **0.000** |  | **0.000** |  |
| Bog | 13.438 | **2.000** | a* | **1.625** | ab | **10.375** | ab |
| Char | 11.941 | **2.412** | a | **4.000** | c | **6.412** | ac |
| CSK | 14.438 | **2.938** | abc | **0.938** | a | **10.938** | b |
| Flin | 10.625 | **5.875** | bc | **1.625** | ab | **3.750** | c |
| Nao | 15.188 | **6.625** | b | **2.125** | abc | **7.313** | abc |
| Ron | 12.571 | **3.429** | abc | **5.429** | c | **4.571** | c |
| Wab | 12.000 | **3.125** | ac | **3.063** | bc | **6.750** | ac |
| Sex Kruskal Pvalue | 0.382 | 0.205 |  | 0.060 |  | 0.912 |  |
| F | 13.458 | 4.063 |  | 2.458 |  | 7.667 |  |
| M | 12.729 | 3.167 |  | 2.604 |  | 7.688 |  |

**#**Bold characters identify groups for which the Kruskal-Wallis test for location and/or sex is significant at p<0.05.*Different letters within a column indicate significant differences among locations based on Dunn post hoc test. Bog = The Bog (MB), Char = Charron Lake (MB), CSK = Central Saskatchewan (SK), Flin = Flin Flon (SK), Nao = Naosap-Reed (MB), Ron = La Ronge (SK) and Wab = Wabowden (MB).

**Supplementary Table S5A. Effect of location and sex on the relative abundance of fungal phyla (fungal ITS2 dataset)**

| Phylum | Location Kruskal  Pvalue | Bog | Char | CSK | Flin | Nao | Ron | Wab | Sex Kruskal  Pvalue | F | M |
| --- | --- | --- | --- | --- | --- | --- | --- | --- | --- | --- | --- |
| **Ascomycota#** | **0.00056** | **0.656a*** | **0.615a** | **0.783b** | **0.657ab** | **0.649ab** | **0.528a** | **0.613a** | 0.10307 | 0.675 | 0.630 |
| **Neocallimastigomycota** | **0.00152** | **0.069a** | **0.117a** | **0.017b** | **0.056ab** | **0.097a** | **0.157ab** | **0.050ab** | 0.80880 | 0.068 | 0.084 |
| **Basidiomycota** | **0.00152** | **0.169ab** | **0.166ab** | **0.129ab** | **0.151ab** | **0.126a** | **0.226ab** | **0.236b** | 0.29051 | 0.154 | 0.184 |
| **Mortierellomycota** | **0.00111** | **0.003ab** | **0.006ab** | **0.002a** | **0.007ab** | **0.009b** | **0.002a** | **0.004ab** | 0.85754 | 0.004 | 0.005 |
| Basidiobolomycota | 0.09232 | 0.000 | 0.000 | 0.000 | 0.000 | 0.000 | 0.000 | 0.000 | 0.32240 | 0.000 | 0.000 |
| **Chytridiomycota** | **0.00013** | **0.003ab** | **0.003ab** | **0.001a** | **0.007b** | **0.008b** | **0.007ab** | **0.003ab** | 0.34056 | 0.004 | 0.004 |
| Mucoromycota | 0.33217 | 0.001 | 0.002 | 0.005 | 0.003 | 0.006 | 0.002 | 0.003 | 0.37365 | 0.004 | 0.002 |
| **Olpidiomycota** | **0.00064** | **0.000a** | **0.001ab** | **0.002b** | **0.002ab** | **0.002ab** | **0.001ab** | **0.000a** | 0.08900 | 0.001 | 0.001 |
| Rozellomycota | 0.33625 | 0.000 | 0.000 | 0.000 | 0.000 | 0.000 | 0.000 | 0.000 | 0.53097 | 0.000 | 0.000 |

**#**Bold characters identify phyla for which the Kruskal-Wallis test for location and/or sex is significant at p<0.05.*Different letters within each line indicate significant differences among locations based on Dunn post hoc test. Bog = The Bog (MB), Char = Charron Lake (MB), CSK = Central Saskatchewan (SK), Flin = Flin Flon (SK), Nao = Naosap-Reed (MB), Ron = La Ronge (SK) and Wab = Wabowden (MB).

**Supplementary Table S5B. Effect of location and sex on fungal alpha diversity (fungal ITS2 dataset)**

|  | **#Chao** |  | **Shannon** |
| --- | --- | --- | --- |
| Location Kruskal Pvalue | **0.00014** |  | 0.06598 |
| Bog | **232.250** | a* | 4.366 |
| Char | **265.647** | ab | 4.445 |
| CSK | **331.438** | b | 4.791 |
| Flin | **262.000** | ab | 4.678 |
| Nao | **237.600** | a | 4.603 |
| Ron | **280.429** | ab | 4.330 |
| Wab | **246.750** | a | 4.555 |
| Sex Kruskal Pvalue | **0.02578** |  | **0.03851** |
| F | **279.979** |  | **4.653** |
| M | **248.896** |  | **4.439** |

**#**Bold characters identify alpha diversity indices for which the Kruskal-Wallis test for location and/or sex is significant at p<0.05.*Different letters within a column indicate significant differences among locations based on Dunn post hoc test. Bog = The Bog (MB), Char = Charron Lake (MB), CSK = Central Saskatchewan (SK), Flin = Flin Flon (SK), Nao = Naosap-Reed (MB), Ron = La Ronge (SK) and Wab = Wabowden (MB).

**Supplementary Table S5C. Adonis pairwise comparison of plant beta diversity between locations (fungal ITS2 dataset)**

|  | Df | SumsOfSqs | F.Model | R2 | p.value | p.adjusted |
| --- | --- | --- | --- | --- | --- | --- |
| **La Ronge Lake (SK) vs Flin Flon (SK)#** | **1** | **0.610** | **2.000** | **0.133** | **0.001** | **0.021** |
| **La Ronge Lake (SK) vs Central Saskatchewan (SK)** | **1** | **1.526** | **6.466** | **0.235** | **0.001** | **0.021** |
| **La Ronge Lake (SK) vs Wabowden (MB)** | **1** | **0.742** | **2.322** | **0.100** | **0.001** | **0.021** |
| **La Ronge Lake (SK) vs The Bog (MB)** | **1** | **1.086** | **3.590** | **0.146** | **0.001** | **0.021** |
| **La Ronge Lake (SK) vs Naosap-Reed (MB)** | **1** | **0.855** | **2.845** | **0.125** | **0.001** | **0.021** |
| **La Ronge Lake (SK) vs Charron Lake (MB)** | **1** | **0.711** | **2.305** | **0.095** | **0.001** | **0.021** |
| **Flin Flon (SK) vs Central Saskatchewan (SK)** | **1** | **1.418** | **5.987** | **0.214** | **0.001** | **0.021** |
| Flin Flon (SK) vs Wabowden (MB) | 1 | 0.368 | 1.163 | 0.050 | 0.103 | 1.000 |
| Flin Flon (SK) vs The Bog (MB) | 1 | 0.515 | 1.716 | 0.072 | 0.007 | 0.147 |
| Flin Flon (SK) vs Naosap-Reed (MB) | 1 | 0.314 | 1.050 | 0.048 | 0.327 | 1.000 |
| **Flin Flon (SK) vs Charron Lake (MB)** | **1** | **0.497** | **1.623** | **0.066** | **0.002** | **0.042** |
| **Central Saskatchewan (SK) vs Wabowden (MB)** | **1** | **1.771** | **6.680** | **0.182** | **0.001** | **0.021** |
| **Central Saskatchewan (SK) vs The Bog (MB)** | **1** | **2.294** | **9.057** | **0.232** | **0.001** | **0.021** |
| **Central Saskatchewan (SK) vs Naosap-Reed (MB)** | **1** | **2.052** | **8.199** | **0.220** | **0.001** | **0.021** |
| **Central Saskatchewan (SK) vs Charron Lake (MB)** | **1** | **2.108** | **8.135** | **0.208** | **0.001** | **0.021** |
| **Wabowden (MB) vs The Bog (MB)** | **1** | **0.824** | **2.645** | **0.081** | **0.001** | **0.021** |
| **Wabowden (MB) vs Naosap-Reed (MB)** | **1** | **0.532** | **1.712** | **0.056** | **0.001** | **0.021** |
| **Wabowden (MB) vs Charron Lake (MB)** | **1** | **0.661** | **2.095** | **0.063** | **0.001** | **0.021** |
| **The Bog (MB) vs Naosap-Reed (MB)** | **1** | **0.670** | **2.247** | **0.072** | **0.001** | **0.021** |
| **The Bog (MB) vs Charron Lake (MB)** | **1** | **0.968** | **3.181** | **0.093** | **0.001** | **0.021** |
| **Naosap-Reed (MB) vs Charron Lake (MB)** | **1** | **0.643** | **2.121** | **0.066** | **0.001** | **0.021** |

**#**Bold characters are used to identify significant Adonis pairwise comparisons (adjusted p<0.05).Bog = The Bog (MB), Char = Charron Lake (MB), CSK = Central Saskatchewan (SK), Flin = Flin Flon (SK), Nao = Naosap-Reed (MB), Ron = La Ronge (SK) and Wab = Wabowden (MB).

**Supplementary Table S5D. Effect of sex and location on the number of lichen ASVs (fungal ITS2 dataset)**

|  | **Number of lichen ASVs composing the diet#** |  | **Number of crustose ASVs** |  | **Number of epiphyte foliose ASVs** |  | **Number of epiphyte fruticose ASVs** |  | Number of foliose ASVs | **Number of fruticose ASVs** |  |
| --- | --- | --- | --- | --- | --- | --- | --- | --- | --- | --- | --- |
| Location Kruskal Pvalue | **0.00122** |  | **0.00000** |  | **0.00000** |  | **0.00000** |  | 0.65380 | **0.00001** |  |
| Bog | **13.688** | a* | **0.188** | ab | **1.00** | a | **3.375** | a | 0.063 | **9.063** | ab |
| Char | **20.235** | ab | **0.529** | abc | **1.294** | a | **3.765** | a | 0.059 | **14.588** | a |
| CSK | **24.500** | b | **1.125** | c | **5.188** | b | **13.938** | b | 0.188 | **4.063** | b |
| Flin | **18.250** | ab | **0.000** | ab | **1.625** | ab | **2.625** | a | 0.125 | **13.875** | a |
| Nao | **16.375** | ab | **0.000** | a | **0.750** | a | **3.125** | a | 0.000 | **12.599** | a |
| Ron | **25.143** | b | **0.714** | bc | **1.571** | ab | **2.571** | a | 0.143 | **20.143** | a |
| Wab | **20.750** | ab | **0.063** | ab | **1.4375** | a | **3.5625** | a | 0.125 | **15.563** | a |
| Sex Kruskal Pvalue | 0.14630 |  | 0.49680 |  | 0.10770 |  | 0.45100 |  | 0.08158 | 0.47880 |  |
| F | 20.896 |  | 0.333 |  | 2.104 |  | 5.604 |  | 0.146 | 12.708 |  |
| M | 18.083 |  | 0.417 |  | 1.646 |  | 4.542 |  | 0.042 | 9.04 |  |

**#**Bold characters are used to identify groups for which the Kruskal-Wallis test for location and/or sex is significant at p<0.05.*Different letters within a column indicate significant differences among locations based on Dunn post hoc test. Bog = The Bog (MB), Char = Charron Lake (MB), CSK = Central Saskatchewan (SK), Flin = Flin Flon (SK), Nao = Naosap-Reed (MB), Ron = La Ronge (SK) and Wab = Wabowden (MB).

**Supplementary Table S6A. Effect of location and sex on the relative abundance of prokaryotic phyla** **(16S rRNA gene dataset)**

| Phylum | Location Kruskal  Pvalue | Bog | Char | CSK | Flin | Nao | Ron | Wab | Sex Kruskal  Pvalue | F | M |
| --- | --- | --- | --- | --- | --- | --- | --- | --- | --- | --- | --- |
| Firmicutes | 0.08843 | 0.724 | 0.738 | 0.726 | 0.739 | 0.709 | 0.755 | 0.703 | 0.15510 | 0.718 | 0.731 |
| **Bacteroidota#** | **0.04057** | **0.228a*** | **0.218a** | **0.238a** | **0.221a** | **0.254a** | **0.217a** | **0.259a** | 0.20439 | 0.242 | 0.230 |
| Proteobacteria | 0.06645 | 0.008 | 0.011 | 0.009 | 0.009 | 0.007 | 0.008 | 0.009 | 0.67949 | 0.008 | 0.009 |
| **Verrucomicrobiota** | **0.00286** | **0.016a** | **0.008ab** | **0.006b** | **0.010ab** | **0.010ab** | **0.003b** | **0.009ab** | 0.32033 | 0.009 | 0.010 |
| **Cyanobacteria** | **0.02912** | **0.006ab** | **0.007ab** | **0.004ab** | **0.007ab** | **0.007a** | **0.002b** | **0.007a** | 0.08686 | 0.007 | 0.005 |
| **Euryarchaeota** | **0.00014** | **0.004abc** | **0.006ab** | **0.006a** | **0.002c** | **0.004abc** | **0.004abc** | **0.003bc** | 0.54649 | 0.005 | 0.004 |
| Spirochaetota | 0.09778 | 0.006 | 0.005 | 0.001 | 0.005 | 0.003 | 0.004 | 0.002 | 0.75359 | 0.004 | 0.003 |
| Acidobacteriota | 0.34582 | 0.002 | 0.002 | 0.002 | 0.001 | 0.001 | 0.002 | 0.001 | 0.34590 | 0.001 | 0.001 |
| **Desulfobacterota** | **0.03574** | **0.002a** | **0.002a** | **0.003a** | **0.002a** | **0.002a** | **0.003a** | **0.002a** | 0.34798 | 0.002 | 0.002 |
| Chloroflexi | 0.65488 | 0.001 | 0.001 | 0.001 | 0.001 | 0.001 | 0.001 | 0.001 | 0.61500 | 0.001 | 0.001 |
| **Planctomycetota** | **0.03030** | **0.001a** | **0.001a** | **0.001a** | **0.001a** | **0.001a** | **0.000a** | **0.002a** | 0.37935 | 0.001 | 0.001 |
| **Actinobacteriota** | **0.00006** | **0.001ab** | **0.001a** | **0.002b** | **0.000a** | **0.000a** | **0.000a** | **0.001a** | 0.44065 | 0.001 | 0.001 |
| **Halobacterota** | **0.01916** | **0.000a** | **0.000ab** | **0.000ab** | **0.000ab** | **0.001b** | **0.000ab** | **0.000ab** | 0.48188 | 0.000 | 0.000 |
| Methylomirabilota | 0.11805 | 0.000 | 0.000 | 0.000 | 0.000 | 0.000 | 0.000 | 0.000 | 0.39772 | 0.000 | 0.000 |
| **Unknown** | **0.04447** | **0.000ab** | **0.000a** | **0.000b** | **0.000ab** | **0.000ab** | **0.000ab** | **0.000ab** | 0.12932 | 0.000 | 0.000 |
| Myxococcota | 0.69626 | 0.000 | 0.000 | 0.000 | 0.000 | 0.000 | 0.000 | 0.000 | 0.76487 | 0.000 | 0.000 |
| Nitrospirota | 0.23019 | 0.000 | 0.000 | 0.000 | 0.000 | 0.000 | 0.000 | 0.000 | 0.14355 | 0.000 | 0.000 |
| **Cloacimonadota** | **0.03716** | **0.000a** | **0.000ab** | **0.000ab** | **0.000ab** | **0.000b** | **0.000ab** | **0.000ab** | 0.65690 | 0.000 | 0.000 |
| Gemmatimonadota | 0.15151 | 0.000 | 0.000 | 0.000 | 0.000 | 0.000 | 0.000 | 0.000 | 0.72102 | 0.000 | 0.000 |
| Elusimicrobiota | 0.34203 | 0.000 | 0.000 | 0.000 | 0.000 | 0.000 | 0.000 | 0.000 | 0.49829 | 0.000 | 0.000 |

**#**Bold characters identify phyla for which the Kruskal-Wallis test for location and/or sex is significant at p<0.05.*Different letters within each line indicate significant differences among locations based on Dunn post hoc test. Bog = The Bog (MB), Char = Charron Lake (MB), CSK = Central Saskatchewan (SK), Flin = Flin Flon (SK), Nao = Naosap-Reed (MB), Ron = La Ronge (SK) and Wab = Wabowden (MB).

**Supplementary Table S6B. Effect of location and sex on the relative abundance of the twenty most abundant prokaryotic genera (16S rRNA gene dataset)**

| Genus | Location Kruskal  Pvalue | Bog | Char | CSK | Flin | Nao | Ron | Wab | Sex Kruskal Pvalue | F | M |
| --- | --- | --- | --- | --- | --- | --- | --- | --- | --- | --- | --- |
| **{ Firmicutes } UCG-005#** | **0.00016** | **0.194abc** | **0.211ab** | **0.224a** | **0.187abc** | **0.175c** | **0.228a** | **0.179bc** | 0.55900 | 0.194 | 0.203 |
| **{ Firmicutes }** | **0.00003** | **0.153ab** | **0.161a** | **0.136b** | **0.163ab** | **0.160a** | **0.172a** | **0.143ab** | 0.33694 | 0.152 | 0.155 |
| { Bacteroidota } Bacteroides | 0.25633 | 0.120 | 0.116 | 0.129 | 0.100 | 0.130 | 0.112 | 0.123 | 0.10706 | 0.125 | 0.116 |
| **{ Firmicutes } UCG-010** | **0.00008** | **0.095a** | **0.087ab** | **0.068b** | **0.110a** | **0.101a** | **0.081ab** | **0.106a** | 0.86114 | 0.092 | 0.092 |
| **{ Firmicutes } Christensenellaceae_R-7_group** | **0.00003** | **0.049a** | **0.047a** | **0.065b** | **0.049ab** | **0.053ab** | **0.061ab** | **0.047a** | 0.50765 | 0.053 | 0.052 |
| **{ Firmicutes } [Eubacterium]_coprostanoligenes_group** | **0.01070** | **0.043a** | **0.042a** | **0.037ab** | **0.037ab** | **0.036ab** | **0.031b** | **0.042ab** | 0.12333 | 0.038 | 0.040 |
| **{ Bacteroidota } Prevotella** | **0.00000** | **0.049a** | **0.047a** | **0.001b** | **0.039a** | **0.041a** | **0.052a** | **0.026ab** | 0.87242 | 0.035 | 0.035 |
| { Firmicutes } RF39 | 0.17215 | 0.034 | 0.032 | 0.035 | 0.033 | 0.038 | 0.029 | 0.026 | 0.92291 | 0.033 | 0.033 |
| **{ Bacteroidota } Muribaculaceae** | **0.00010** | **0.024a** | **0.039abc** | **0.061b** | **0.026ac** | **0.033abc** | **0.045bc** | **0.030ac** | 0.85821 | 0.037 | 0.038 |
| **{ Firmicutes } Clostridia_UCG-014** | **0.01500** | **0.029ab** | **0.026ab** | **0.038ab** | **0.032ab** | **0.030ab** | **0.039a** | **0.022b** | 0.92291 | 0.030 | 0.030 |
| { Firmicutes } Roseburia | 0.14465 | 0.022 | 0.022 | 0.019 | 0.021 | 0.016 | 0.024 | 0.021 | 0.80019 | 0.020 | 0.021 |
| **{ Firmicutes } Monoglobus** | **0.00045** | **0.016a** | **0.020ab** | **0.027b** | **0.013a** | **0.018ab** | **0.013a** | **0.017ab** | 0.19395 | 0.020 | 0.018 |
| **{ Firmicutes } uncultured** | **0.00073** | **0.016ab** | **0.019a** | **0.012b** | **0.014ab** | **0.014ab** | **0.014ab** | **0.014ab** | 0.10071 | 0.014 | 0.016 |
| **{ Bacteroidota } Prevotellaceae_UCG-004** | **0.00893** | **0.017ab** | **0.003a** | **0.022b** | **0.025ab** | **0.013ab** | **0.001ab** | **0.012ab** | 0.35762 | 0.012 | 0.015 |
| **{ Bacteroidota } Rikenellaceae_RC9_gut_group** | **0.00000** | **0.007ab** | **0.003a** | **0.009ab** | **0.015abc** | **0.019bc** | **0.000a** | **0.039c** | 0.59784 | 0.015 | 0.012 |
| **{ Firmicutes } Clostridia_vadinBB60_group** | **0.00000** | **0.011a** | **0.009ab** | **0.003b** | **0.015a** | **0.011a** | **0.003b** | **0.014a** | 0.74045 | 0.010 | 0.010 |
| **{ Cyanobacteria } Gastranaerophilales** | **0.02912** | **0.006ab** | **0.007ab** | **0.004ab** | **0.007ab** | **0.007a** | **0.002b** | **0.007a** | 0.08686 | 0.007 | 0.005 |
| { Firmicutes } Lachnospiraceae_AC2044_group | 0.16554 | 0.009 | 0.007 | 0.005 | 0.014 | 0.006 | 0.007 | 0.007 | 0.05338 | 0.006 | 0.009 |
| **{ Bacteroidota } Alistipes** | **0.00000** | **0.003ab** | **0.001a** | **0.006bc** | **0.005abc** | **0.008c** | **0.001ab** | **0.010c** | 0.27994 | 0.006 | 0.005 |
| { Verrucomicrobiota } Akkermansia | 0.29537 | 0.005 | 0.007 | 0.004 | 0.007 | 0.006 | 0.003 | 0.007 | 0.13555 | 0.005 | 0.007 |

**#**Bold characters identify genera for which the Kruskal-Wallis test for location and/or sex is significant at p<0.05.*Different letters within each line indicate significant differences among locations based on Dunn post hoc test. Bog = The Bog (MB), Char = Charron Lake (MB), CSK = Central Saskatchewan (SK), Flin = Flin Flon (SK), Nao = Naosap-Reed (MB), Ron = La Ronge (SK) and Wab = Wabowden (MB).

**Supplementary Table S6C. Effect of location and sex on prokaryotic alpha diversity (16S rRNA gene dataset)**

|  | **Chao#** |  | **Shannon** |  |
| --- | --- | --- | --- | --- |
| Location Kruskal Pvalue | **0.00005** |  | **0.00000** |  |
| Bog | **492.688** | ab | **5.191** | abc |
| Char | **482.706** | ab | **5.140** | ab |
| CSK | **453.875** | a | **5.030** | a |
| Flin | **531.500** | b | **5.311** | bc |
| Nao | **543.063** | b | **5.384** | c |
| Ron | **406.714** | a | **4.831** | a |
| Wab | **561.067** | b | **5.350** | bc |
| Sex Kruskal Pvalue | 0.074 |  | 0.217 |  |
| F | 517.396 |  | 5.235 |  |
| M | 483.404 |  | 5.157 |  |

**#**Bold characters identify alpha diversity indices for which the Kruskal-Wallis test for location and/or sex is significant at p<0.05.*Different letters within a column indicate significant differences among locations based on Dunn post hoc test. Bog = The Bog (MB), Char = Charron Lake (MB), CSK = Central Saskatchewan (SK), Flin = Flin Flon (SK), Nao = Naosap-Reed (MB), Ron = La Ronge (SK) and Wab = Wabowden (MB).

**Supplementary Table S6D. Adonis pairwise comparison of prokaryotic beta diversity between locations (16S rRNA gene dataset)**

|  | Df | SumsOfSqs | F,Model | R2 | p,value | p,adjusted |
| --- | --- | --- | --- | --- | --- | --- |
| **The Bog (MB) vs Naosap-Reed (MB)** | 1 | **0,456** | **2,679** | **0,082** | **0,001** | **0,021** |
| **The Bog (MB) vs Wabowden (MB)** | **1** | **0,646** | **3,514** | **0,108** | **0,001** | **0,021** |
| **The Bog (MB) vs Charron Lake (MB)** | **1** | **0,575** | **3,476** | **0,101** | **0,001** | **0,021** |
| **The Bog (MB) vs Central Saskatchewan (SK)** | **1** | **1,111** | **6,791** | **0,185** | **0,001** | **0,021** |
| The Bog (MB) vs Flin Flon (SK) | 1 | 0,256 | 1,456 | 0,062 | 0,011 | 0,231 |
| **The Bog (MB) vs La Ronge Lake (SK)** | **1** | **0,547** | **3,267** | **0,135** | **0,001** | **0,021** |
| **Naosap-Reed (MB) vs Wabowden (MB)** | **1** | **0,435** | **2,491** | **0,079** | **0,001** | **0,021** |
| **Naosap-Reed (MB) vs Charron Lake (MB)** | **1** | **0,571** | **3,642** | **0,105** | **0,001** | **0,021** |
| **Naosap-Reed (MB) vs Central Saskatchewan (SK)** | **1** | **1,202** | **7,765** | **0,206** | **0,001** | **0,021** |
| Naosap-Reed (MB) vs Flin Flon (SK) | 1 | 0,285 | 1,744 | 0,073 | 0,003 | 0,063 |
| **Naosap-Reed (MB) vs La Ronge Lake (SK)** | **1** | **0,557** | **3,602** | **0,146** | **0,001** | **0,021** |
| **Wabowden (MB) vs Charron Lake (MB)** | **1** | **0,803** | **4,740** | **0,136** | **0,001** | **0,021** |
| **Wabowden (MB) vs Central Saskatchewan (SK)** | **1** | **0,922** | **5,500** | **0,159** | **0,001** | **0,021** |
| **Wabowden (MB) vs Flin Flon (SK)** | **1** | **0,432** | **2,376** | **0,102** | **0,001** | **0,021** |
| **Wabowden (MB) vs La Ronge Lake (SK)** | **1** | **0,667** | **3,847** | **0,161** | **0,001** | **0,021** |
| **Charron Lake (MB) vs Central Saskatchewan (SK)** | **1** | **1,337** | **8,891** | **0,223** | **0,001** | **0,021** |
| **Charron Lake (MB) vs Flin Flon (SK)** | **1** | **0,413** | **2,622** | **0,102** | **0,001** | **0,021** |
| **Charron Lake (MB) vs La Ronge Lake (SK)** | **1** | **0,386** | **2,600** | **0,106** | **0,001** | **0,021** |
| **Central Saskatchewan (SK) vs Flin Flon (SK)** | **1** | **0,789** | **5,108** | **0,188** | **0,001** | **0,021** |
| **Central Saskatchewan (SK) vs La Ronge Lake (SK)** | **1** | **0,680** | **4,688** | **0,182** | **0,001** | **0,021** |
| **Flin Flon (SK) vs La Ronge Lake (SK)** | **1** | **0,373** | **2,419** | **0,157** | **0,002** | **0,042** |

**#**Bold characters identify significant Adonis pairwise comparisons (adjusted p<0.05).Bog = The Bog (MB), Char = Charron Lake (MB), CSK = Central Saskatchewan (SK), Flin = Flin Flon (SK), Nao = Naosap-Reed (MB), Ron = La Ronge (SK) and Wab = Wabowden (MB).

**Supplementary Table S6E. Envfit function results (16S rRNA gene dataset)**

| Variables | NMDS1 | NMDS2 | r2 | Pvalue |
| --- | --- | --- | --- | --- |
| **Blastocystis#** | **-0.347** | **0.292** | **0.206** | **0.001** |
| **Entamoeba** | **-0.288** | **0.322** | **0.187** | **0.001** |
| Parelaphostrongylus | 0.040 | -0.216 | 0.048 | 0.112 |
| **Total number of parasite ASVs** | **-0.333** | **0.228** | **0.163** | **0.001** |
| Crustose | 0.211 | -0.107 | 0.056 | 0.069 |
| **Epiphyic.Foliose** | **0.553** | **0.543** | **0.601** | **0.001** |
| **Epiphytic.Fruticose** | **0.645** | **0.332** | **0.526** | **0.001** |
| Foliose | 0.058 | 0.060 | 0.072 | 0.739 |
| **Fruticose** | **-0.334** | **-0.232** | **0.165** | **0.002** |
| Total number of lichen ASVs | 0.188 | 0.086 | 0.043 | 0.143 |
| **Herbaceous** | **-0.323** | **0.147** | **0.126** | **0.003** |
| Lignified | 0.142 | 0.172 | 0.050 | 0.084 |
| **Non-vascular** | **-0.107** | **-0.279** | **0.089** | **0.010** |
| Total number of plant ASVs | -0.115 | 0.109 | 0.025 | 0.315 |

**#**Bold characters identify significant variables (p<0.05).Bog = The Bog (MB), Char = Charron Lake (MB), CSK = Central Saskatchewan (SK), Flin = Flin Flon (SK), Nao = Naosap-Reed (MB), Ron = La Ronge (SK) and Wab = Wabowden (MB).

**
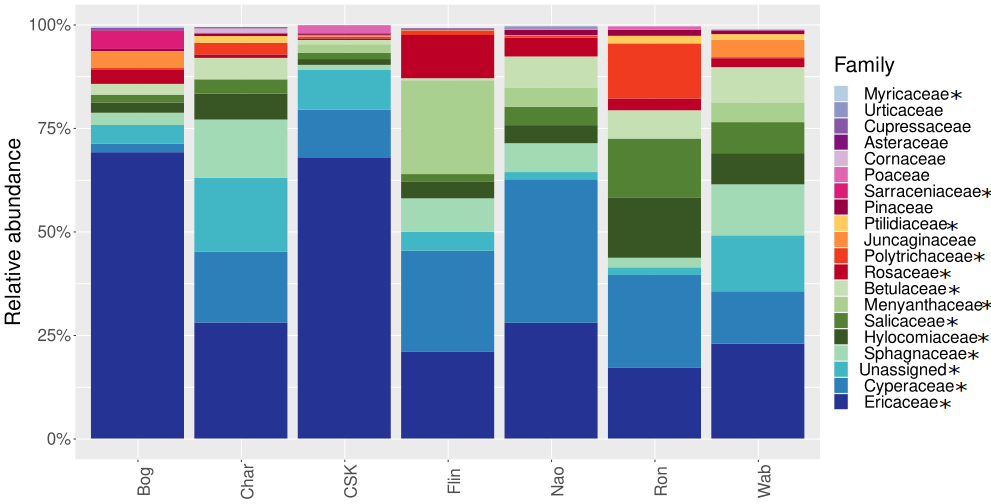
Supplementary Figure S1.** Relative abundance of the twenty most abundant plant families detected in caribou fecal DNA based on the sequencing of the plant ITS2 region, by location. Bog = The Bog (MB), Char = Charron Lake (MB), CSK = Central Saskatchewan (SK), Flin = Flin Flon (SK), Nao = Naosap-Reed (MB), Ron = La Ronge (SK) and Wab = Wabowden (MB). Black stars indicate phyla for which the Kruskal-Wallis test was significant at p<0.05.

**
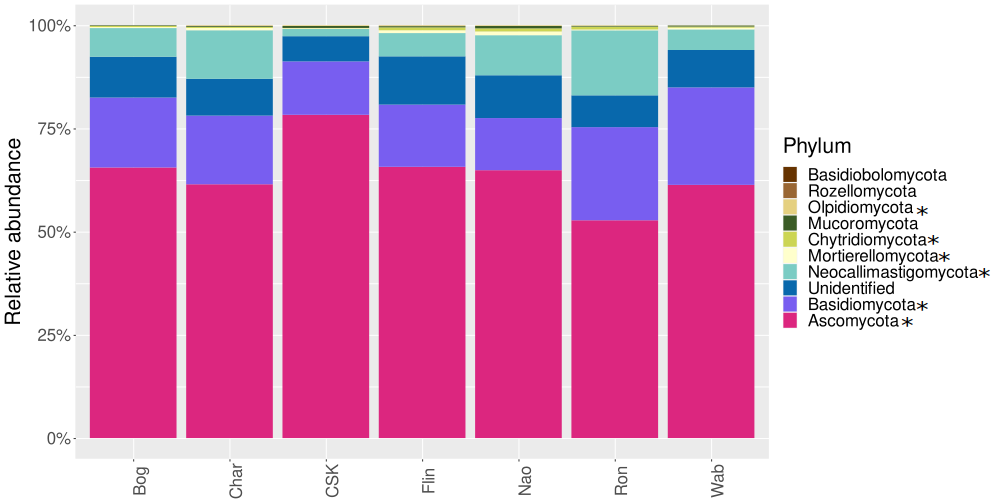
Supplementary Figure S2**. Relative abundance of fungal phyla detected in caribou fecal DNA based on the sequencing of the fungal ITS2 region, by location. Bog = The Bog (MB), Char = Charron Lake (MB), CSK = Central Saskatchewan (SK), Flin = Flin Flon (SK), Nao = Naosap-Reed (MB), Ron = La Ronge (SK) and Wab = Wabowden (MB). Black stars indicate phyla with significantly different relative abundances between locations.


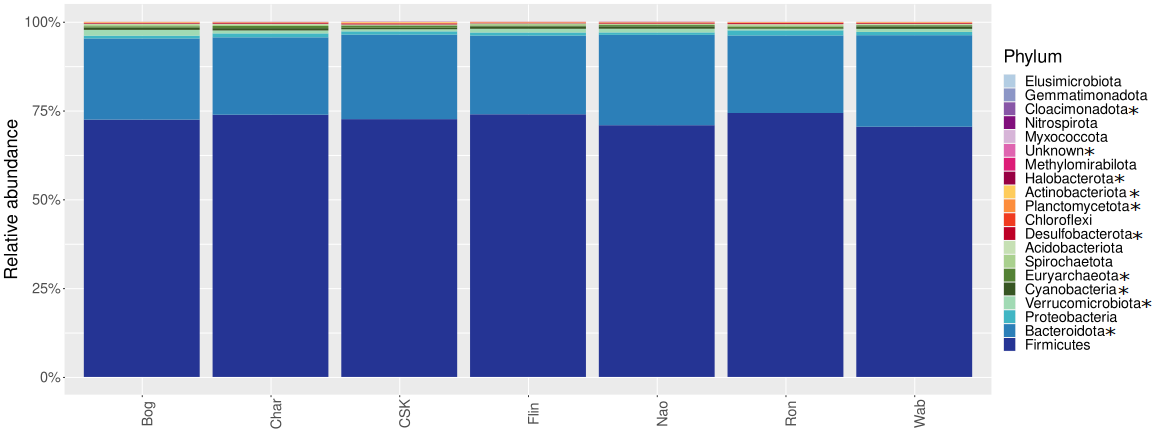


**Supplementary Figure S3**. Relative abundance of bacterial phyla detected in caribou fecal DNA based on the sequencing of the 16S rRNA gene, by location. Bog = The Bog (MB), Char = Charron Lake (MB), CSK = Central Saskatchewan (SK), Flin = Flin Flon (SK), Nao = Naosap-Reed (MB), Ron = La Ronge (SK) and Wab = Wabowden (MB). Black stars indicate phyla with significantly different relative abundances between locations.


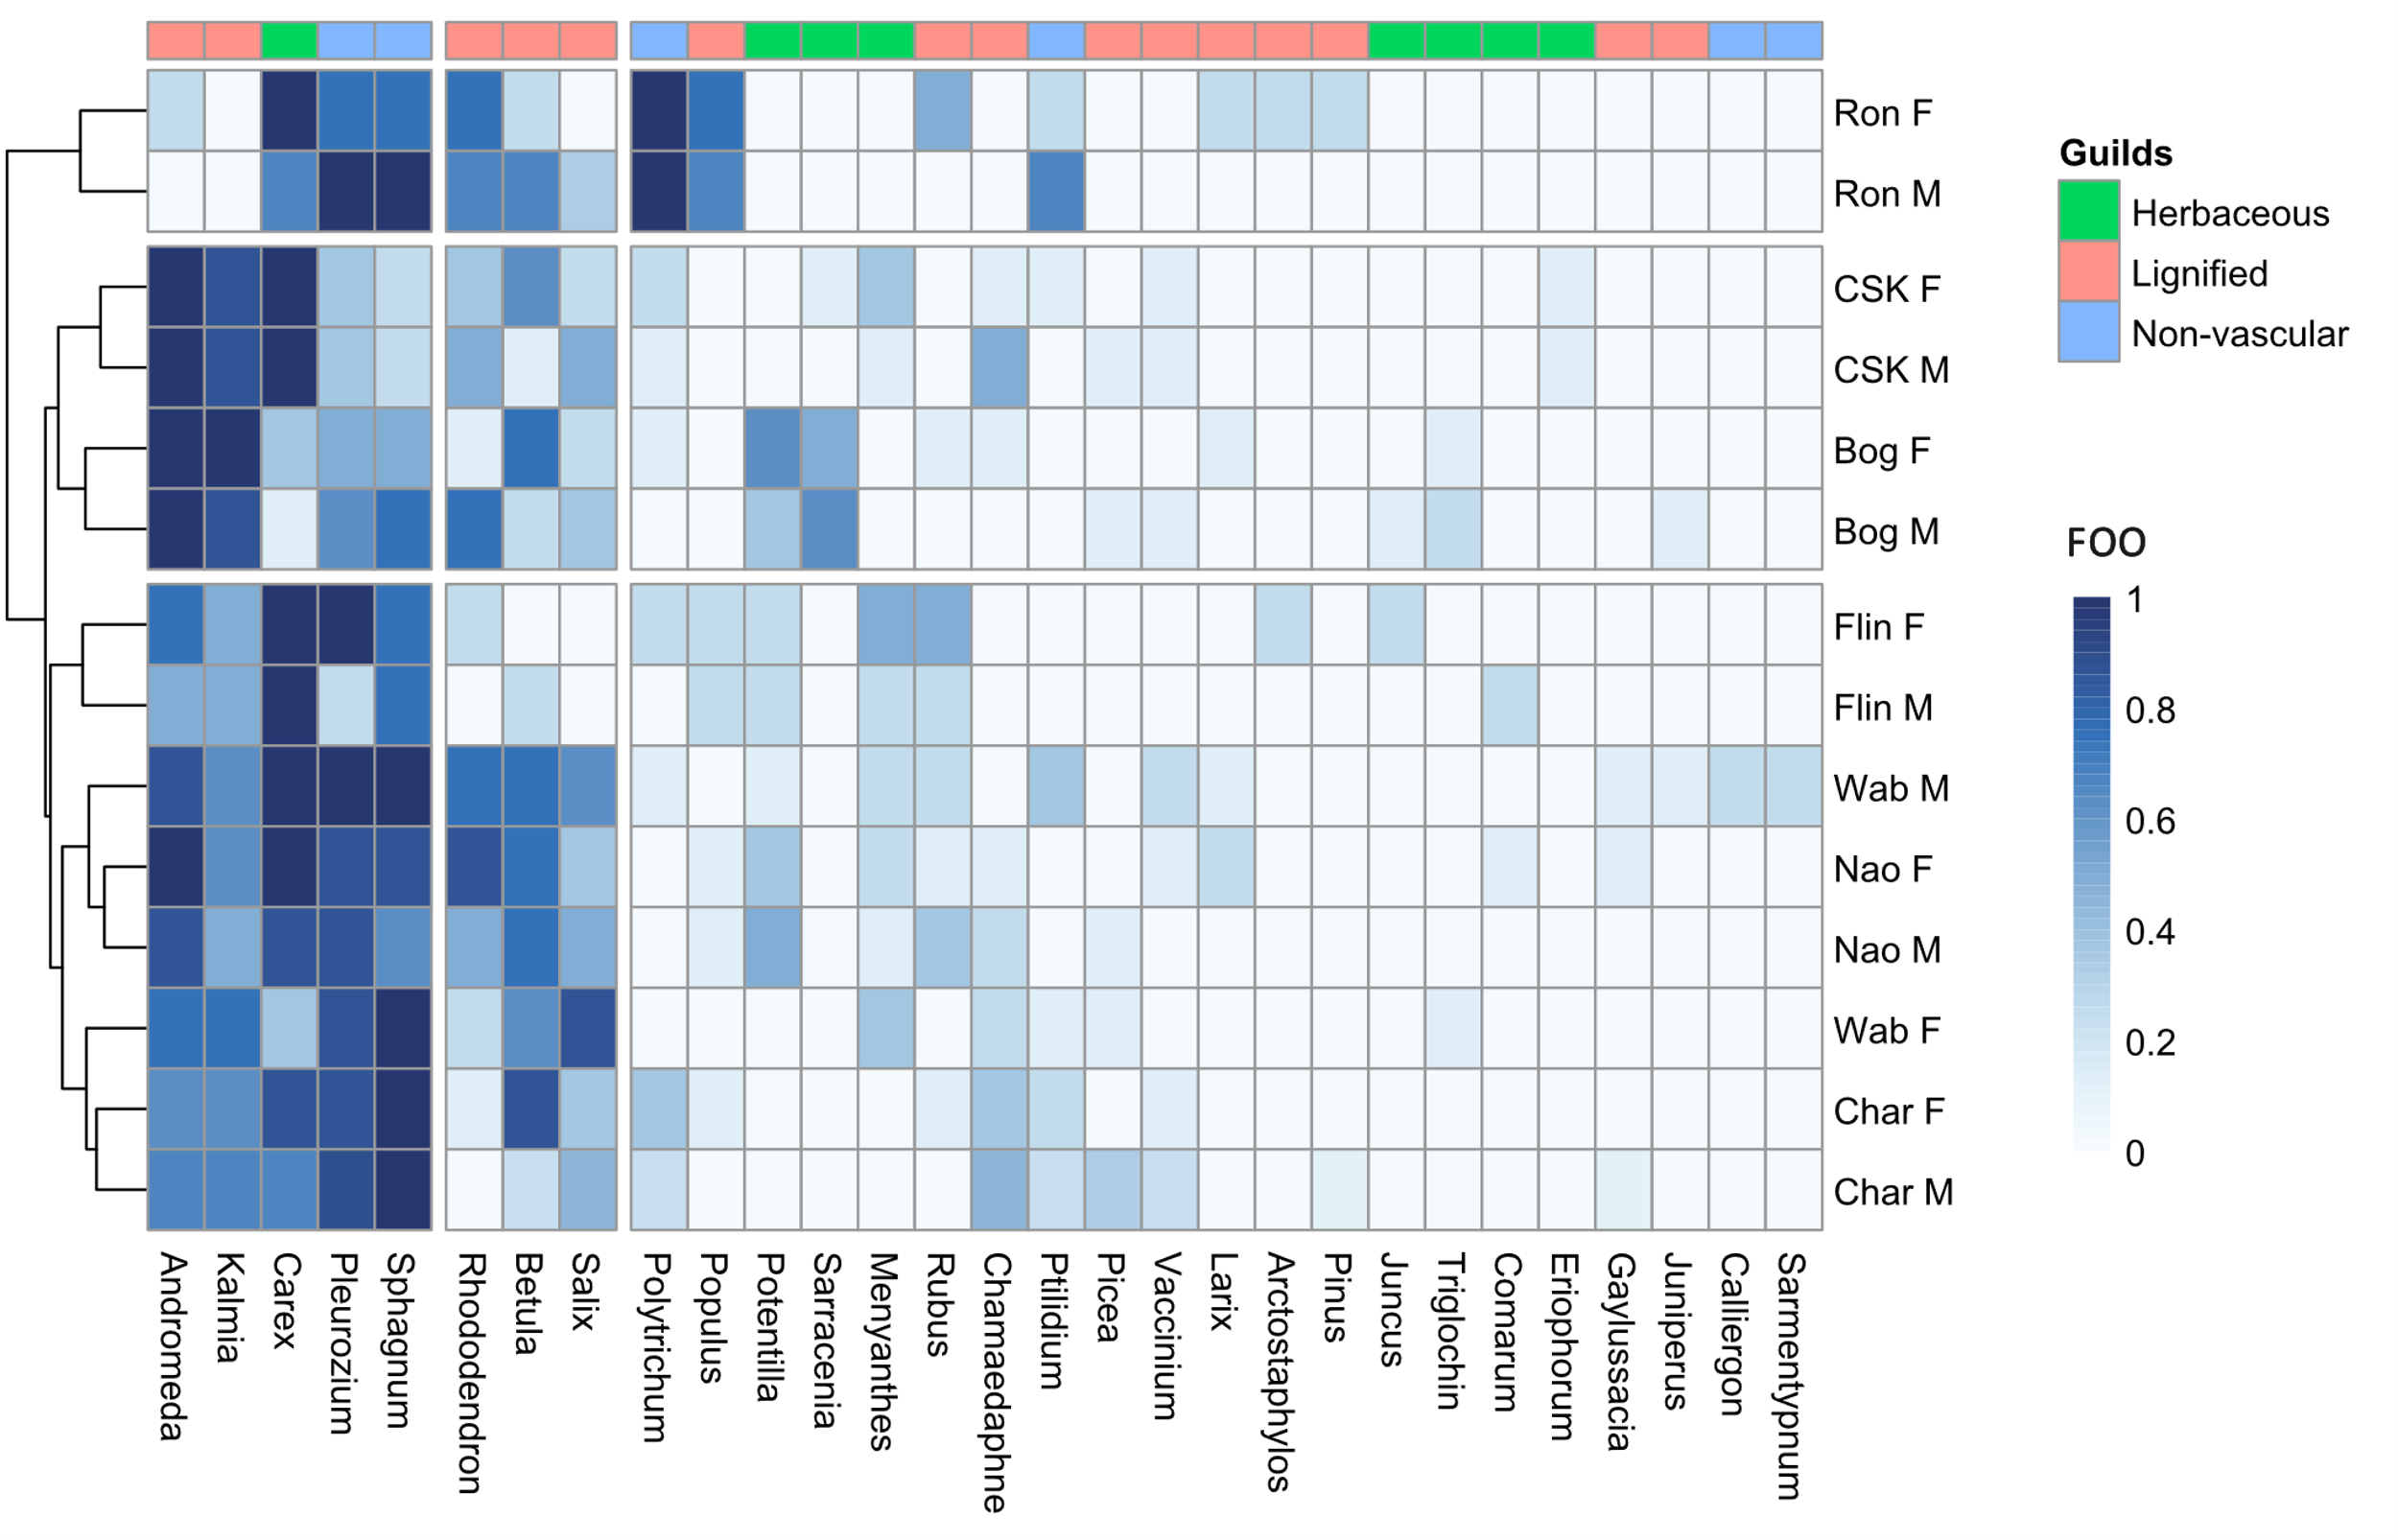


**Supplementary Figure S4**. Heatmap of the frequency of occurrence of plant genera composing the caribou diet based on the sequencing of the plant and fungal ITS2 regions from fecal DNA, by location and sex. Bog = The Bog (MB), Char = Charron Lake (MB), CSK = Central Saskatchewan (SK), Flin = Flin Flon (SK), Nao = Naosap-Reed (MB), Ron = La Ronge (SK) and Wab = Wabowden (MB). F = Female, M = Male.


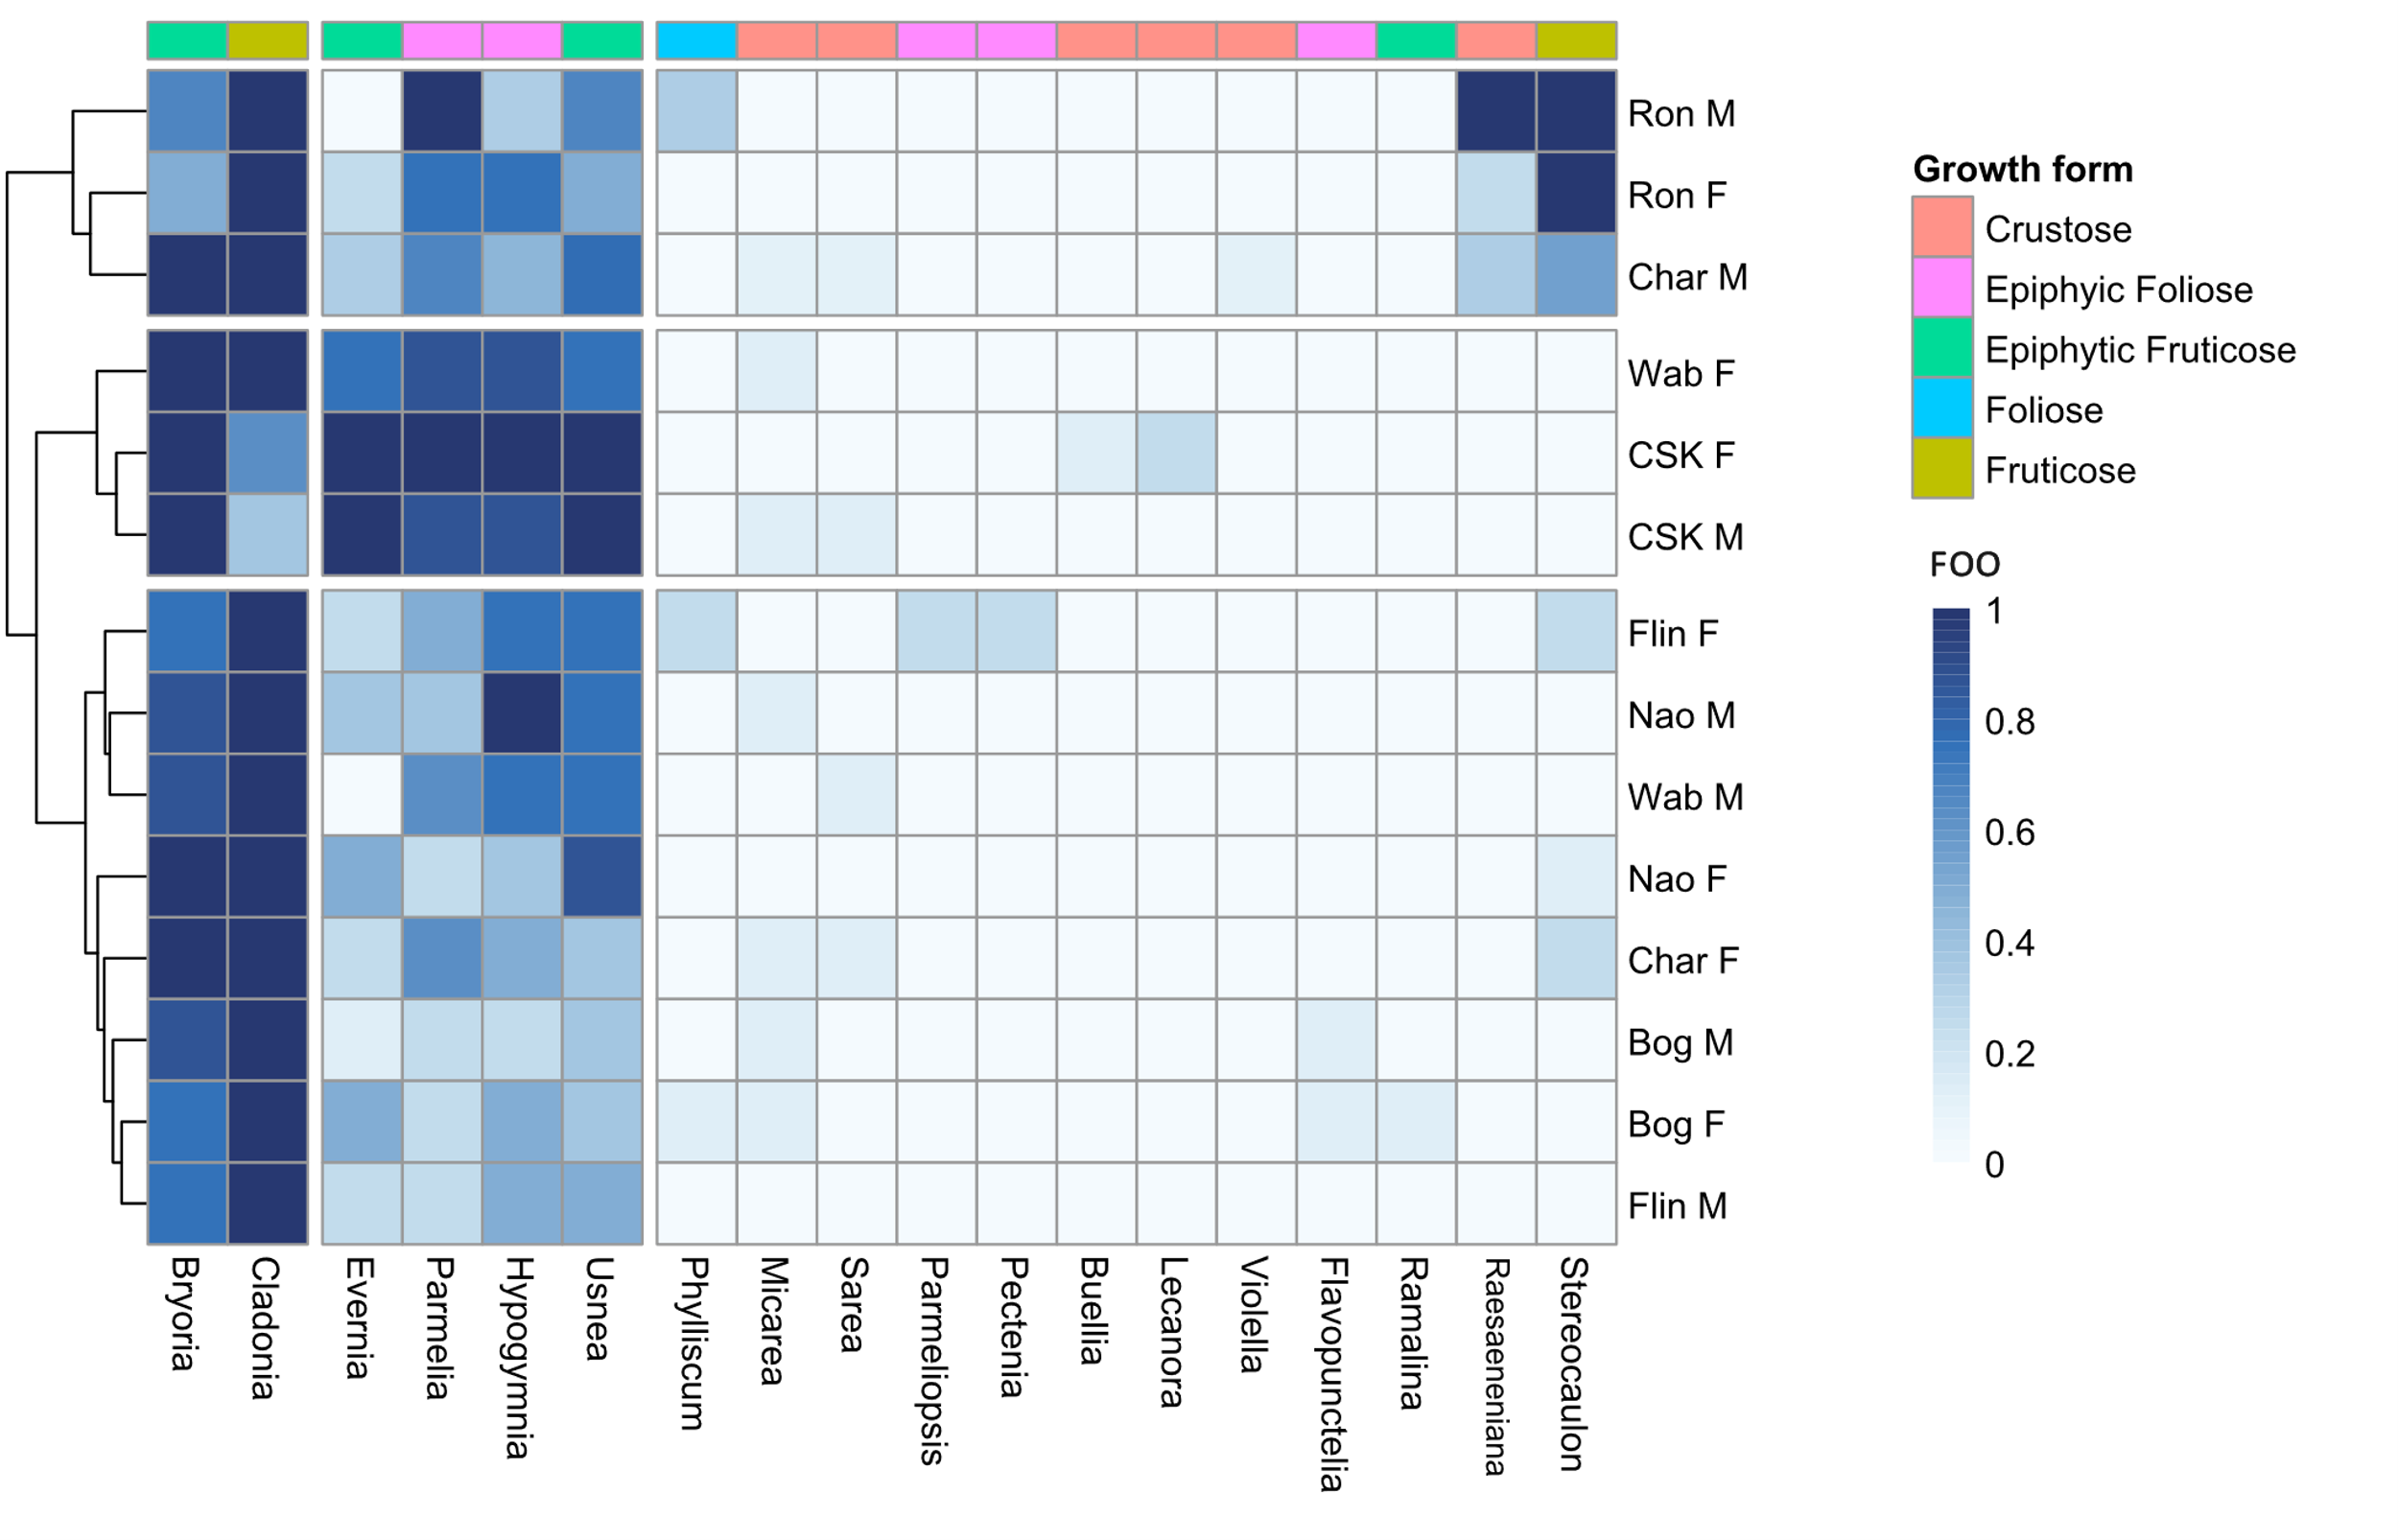


**Supplementary Figure S5**. Heatmap of the frequency of occurrence of lichen genera composing the caribou diet based on the sequencing of the plant and fungal ITS2 regions from fecal DNA, by location and sex. Bog = The Bog (MB), Char = Charron Lake (MB), CSK = Central Saskatchewan (SK), Flin = Flin Flon (SK), Nao = Naosap-Reed (MB), Ron = La Ronge (SK) and Wab = Wabowden (MB). F = Female, M = Male.


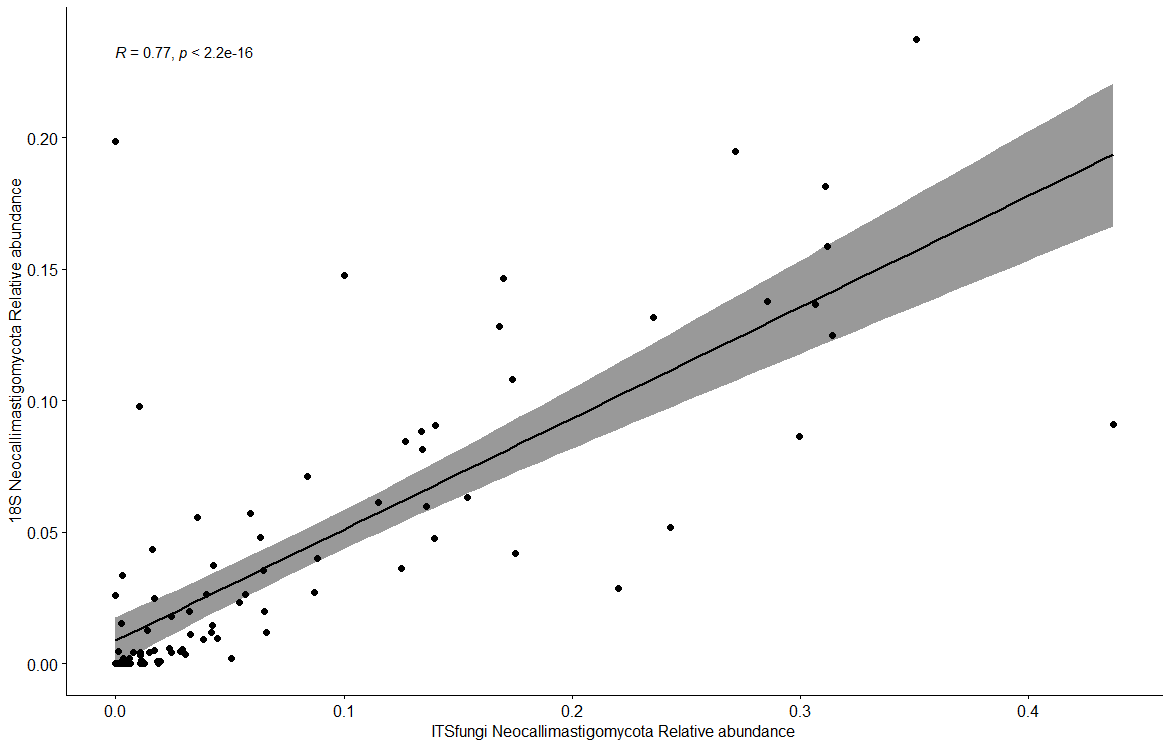


**Supplementary Figure S6**. Pearson correlation between the relative abundance of the *Neocallimastigomycota* phylum based on sequencing of the ITS2 region (X-axis) and the 18S rRNA gene (Y-axis).
